1 **Ethane-dependent synthesis of polyhydroxyalkanoates by**  
2 **the obligate methanotroph *Methylocystis parvus* OBBP**

3 Jaewook Myung<sup>a,e,#</sup>, James C. A. Flanagan<sup>b,f</sup>, Wakuna M. Galega<sup>a</sup>, Robert M. Waymouth<sup>b</sup>, Craig  
4 S. Criddle<sup>a,c,d</sup>

5 <sup>a</sup> Department of Civil and Environmental Engineering, Stanford University, Stanford, CA 94305,  
6 USA

7 <sup>b</sup> Department of Chemistry, Stanford University, Stanford, California 94305, USA

8 <sup>c</sup> Woods Institute for the Environment, Stanford, CA 94305, USA

9 <sup>d</sup> William and Cloy Codiga Resource Recovery Center, Stanford, CA 94305, USA

10 <sup>e</sup> Current address: Department of Civil and Environmental Engineering, Southern Methodist  
11 University, Dallas, TX 75205, USA

12 <sup>f</sup> Current address: Brighton College, Eastern Road, Brighton, BN2 0AL, United Kingdom

13

14 Running title: Methanotrophic synthesis of PHAs using ethane

15

16 # Address correspondence to: Jaewook Myung, [jjaimyung@smu.edu](mailto:jjaimyung@smu.edu)

17 Phone: (+1) 214-768-4229

18 **ABSTRACT** (250 words)

19 Under conditions of nutrient-limited growth, Type II obligate methanotrophs oxidize C<sub>1</sub>  
20 compounds, such as methane or methanol and accumulate intracellular granules of poly(3-  
21 hydroxybutyrate) (P3HB). Here, we report that, under same nutrient-limited conditions, the Type  
22 II obligate methanotroph *Methylocystis parvus* OBBP can use ethane as its sole carbon and  
23 energy source for synthesis P3HB granules, accumulating up to 35 ± 4 wt% P3HB. <sup>13</sup>C-NMR  
24 spectra of the P3HB confirmed incorporation of <sup>13</sup>C from [<sup>13</sup>C<sub>2</sub>]ethane. Moreover, when valerate  
25 was added as a co-substrate with ethane, oxidation of the ethane supported synthesis of the  
26 copolymer poly(3-hydroxybutyrate-*co*-3-hydroxyvalerate) (PHBV).

27 **IMPORTANCE** (150 words, nontechnical explanation of the significance of the study)

28 The presence of ethane in natural gas is often considered undesirable for methanotroph-based  
29 biotechnology due to the C<sub>1</sub> specialization of obligate methanotrophs and concerns about  
30 inhibitory byproducts arising from methane monooxygenase-mediated cometabolism of ethane.  
31 This work establishes that co-oxidation of ethane and further metabolism in the absence of  
32 methane can support synthesis of the valuable polyhydroxyalkanoate bioplastics P3HB and  
33 PHBV.

34 **KEYWORDS**

35 ethane; methanotroph; methane monooxygenase; PHA; PHB; natural gas; polyhydroxyalkanoate  
36 synthesis

37

## 38 INTRODUCTION

39 Aerobic methanotrophs are a unique group of gram-negative bacteria capable of utilizing  
40 methane as sole carbon and energy source (1). The control of methanotrophs is critical as they  
41 play a key role in mitigating the greenhouse gas impacts of methane (2) and can produce nitrous  
42 oxide, an even more powerful global warming agent (3). Biotechnological applications of  
43 methanotrophic bacteria include production of biodiesel (4), propylene oxide (5), single cell  
44 protein (6), extracellular polysaccharides (7), human health supplements (8), and bioplastics,  
45 including poly(3-hydroxybutyrate) (P3HB) (9–11), poly(3-hydroxybutyrate-*co*-3-  
46 hydroxyvalerate) (PHBV) (11–14), poly(3-hydroxybutyrate-*co*-4-hydroxybutyrate), poly(3-  
47 hydroxybutyrate-*co*-5-hydroxyvalerate-*co*-3-hydroxyvalerate), and poly(3-hydroxybutyrate-*co*-  
48 6-hydroxyhexanoate-*co*-4-hydroxybutyrate) (15).

49 Ethane (C<sub>2</sub>H<sub>6</sub>) is of interest for methanotroph-based biotechnology because it is the second most  
50 common component of natural gas (up to 5–10%) after methane (16). Because the obligate  
51 methanotrophs are one-carbon specialists, ethane is typically depicted as an undesirable  
52 contaminant (17). While cometabolic oxidation of ethane to ethanol by methane monooxygenase  
53 is well-known, soluble products resulting from this oxidation are often viewed as inhibitory and  
54 an obstacle to beneficial use of natural gas. In this study, we report P3HB production by a pure  
55 culture of *Methylocystis parvus* OBBP when ethane is added as the sole source of carbon during  
56 nitrogen-limited, unbalanced growth. We further demonstrate that ethane oxidation can support  
57 synthesis of PHBV when valerate is provided as a co-substrate during unbalanced growth.

## 58 MATERIALS AND METHODS

59 **Culture conditions.** Unless otherwise specified, all *Methylocystis parvus* OBBP cultures were  
60 grown in medium JM2, which is a modified version of ammonium mineral salts (AMS) medium  
61 (18). Medium JM2 contained the following chemicals per L of solution: 2.4 mM  $\text{MgSO}_4 \cdot 7\text{H}_2\text{O}$ ,  
62 0.26 mM  $\text{CaCl}_2$ , 36 mM  $\text{NaHCO}_3$ , 4.8 mM  $\text{KH}_2\text{PO}_4$ , 6.8 mM  $\text{K}_2\text{HPO}_4$ , 10.5  $\mu\text{M}$   $\text{Na}_2\text{MoO}_4 \cdot$   
63  $2\text{H}_2\text{O}$ , 7  $\mu\text{M}$   $\text{CuSO}_4 \cdot 5\text{H}_2\text{O}$ , 200  $\mu\text{M}$  Fe-EDTA, 530  $\mu\text{M}$  Ca-EDTA, 5 mL trace metal solution,  
64 and 20 mL vitamin solution. The trace stock solution contained the following chemicals per L of  
65 solution: 500 mg  $\text{FeSO}_4 \cdot 7\text{H}_2\text{O}$ , 400 mg  $\text{ZnSO}_4 \cdot 7\text{H}_2\text{O}$ , 20 mg  $\text{MnCl}_2 \cdot 7\text{H}_2\text{O}$ , 50 mg  $\text{CoCl}_2 \cdot$   
66  $6\text{H}_2\text{O}$ , 10 mg  $\text{NiCl}_2 \cdot 6\text{H}_2\text{O}$ , 15 mg  $\text{H}_3\text{BO}_3$  and 250 mg EDTA. The vitamin stock solution  
67 contained the following chemicals per L of solution: 2.0 mg biotin, 2.0 mg folic acid, 5.0 mg  
68 thiamine  $\cdot$  HCl, 5.0 mg calcium pantothenate, 0.1 mg vitamin B12, 5.0 mg riboflavin and 5.0 mg  
69 nicotinamide.

70 All cultures were incubated in 160 mL serum bottles (Wheaton, Millville, NJ, USA) capped with  
71 butyl-rubber stoppers and crimp-sealed under a methane/oxygen headspace (molar ratio 1:1.5; >  
72 99% purity; Praxair Technology, Inc., Danbury, CT, USA). Liquid volume was 50 mL, and the  
73 headspace volume was 110 mL. Cultures were incubated horizontally on orbital shaker tables at  
74 150 rpm. The incubation temperature was 30 °C.

75 **Methane-fed balanced growth phase.** Fifty-milliliter cultures were grown to final optical  
76 densities ( $\text{OD}_{600}$ ) of 0.8–1.2 then centrifuged ( $3000 \times g$ ) for 15 min. The pellets were  
77 resuspended in 30 mL of JM medium to create the inoculum for triplicate 160 mL serum bottle  
78 cultures. Each culture received 10 mL inoculum plus 40 mL of fresh medium (39.5 mL of  
79 medium JM plus 0.5 mL of 1.35 M ammonium chloride stock) and was flushed for 5 min with a  
80 methane/oxygen mixture (molar ratio of 1:1.5). After growth at 30 °C for 24 h, the headspace in

81 each culture was again flushed for 5 min with the methane/oxygen mixture then incubated at  
82 30 °C for a second 24 h period of balanced growth. All experiments were carried out in triplicate.

83 **Ethane-fed unbalanced growth phase.** After 48 h, all cultures were harvested and subjected to  
84 nitrogen-limiting conditions. Triplicate samples were centrifuged ( $3000 \times g$ ) for 15 min and  
85 suspended in fresh medium without nitrogen. The headspace of each bottle was flushed with the  
86 ethane/oxygen gas mixture (molar ratio of 1:1.5, > 99% purity; Praxair Technology, Inc.,  
87 Danbury, CT, USA) at  $t = 0$  h and  $t = 24$  h. To confirm ethane incorporation into the P3HB  
88 granules, [ $^{13}\text{C}_2$ ]ethane (99 atom%  $^{13}\text{C}_2$  ethane, Sigma-Aldrich, St. Louis, MO, USA) was added  
89 in some cycles.

90 **Ethane-fed unbalanced growth phase plus valerate.** After detection of P3HB from ethane-  
91 growth cell cultures, tests were performed to determine whether ethane could support production  
92 of PHBV when valerate was added during the PHA accumulation phase. Grown cells were  
93 centrifuged (3500 rpm) for 15 min to create a pellet. The cell pellet was re-suspended in 50 mL  
94 of JM2 media without added nitrogen, and vortexed vigorously to obtain a uniform suspension.  
95 The suspension was transferred into 160-mL serum bottle, capped and crimp sealed. Valerate (10  
96 mM) was added as sodium valerate to a subset of the serum bottles to determine whether ethane  
97 could support production of PHBV. The headspace was flush with  $\text{C}_2\text{H}_6:\text{O}_2$  mixture (molar ratio  
98 1:4; > 99% purity; Praxair Technology, Inc., Danbury, CT, USA) and incubated for 48 hr. At the  
99 24-hr midway point, the headspace of each vial was flushed with the same ethane mixture. At the  
100 end of the 48-hr PHA accumulation period, the cells were harvested, centrifuged ( $3000 \times g$ ) for  
101 15 min to create a pellet, and then freeze dried for further PHA analysis.

102 **Ethane oxidation products analysis.** In some ethane-fed unbalanced growth phases, 1 mL of  
103 cell suspensions were sampled every 15 min during the first initial hour to analyze the  
104 concentrations of oxidation products (alcohols, aldehydes, and carboxylic acids) of ethane.  
105 Products were determined using gas chromatography (detailed methods are discussed in  
106 Analytical methods).

107 **Culture purity check.** To test culture purity, biomass was removed after the 48 h period of  
108 balanced growth. Genomic DNA was extracted using the FastDNA SPIN Kit for Soil (MP  
109 Biomedicals, Santa Ana, CA, USA), as per the manufacture's protocol. Bacterial 16S rRNA was  
110 amplified using the bacterial primers BAC-8F (5'-AGAGTTTGATCCTGGCTCAG-3') and  
111 BAC-1492R (5'-CGGCTACCTTGTACGACTT-3') (19). A polymerase chain reaction (PCR)  
112 was performed using AccuPrime Taq DNA Polymerase System (Invitrogen, Carlsbad, CA, USA)  
113 with the following thermocycling steps: (i) 94 °C for 5 min; (ii) 30 cycles consisting of 94 °C for  
114 30 s, 55 °C for 30 s, 68 °C for 80 s; and (iii) an extension at 68 °C for 10 min. Amplicon  
115 presence and quality of PCR reaction were verified via 1.5% agarose gel electrophoresis.

116 PCR products were purified using QIAquick PCR Purification Kit (Qiagen, Chatsworth, CA,  
117 USA), then cloned using pGEM-T Easy Vector System with JM109 competent Escherichia coli  
118 cells (Promega, Madison, WI, USA) per the manufacture's protocol. Randomly selected clones  
119 were sequenced by Elim Biopharmaceuticals Inc. (Hayward, CA, USA), generating 120 near-full  
120 length 16S rRNA gene sequences. Retrieved DNA sequences were compared with reference  
121 sequences using Basic Local Alignment Search Tool (BLAST).

122 **Confirmation of obligate methanotrophy.** To test use of ethane as a carbon source for growth,  
123 cultures were incubated under ethane/oxygen gas mixture (molar ratio of 1:1.5, > 99% purity;

124 Praxair Technology, Inc., Danbury, CT, USA) in 50 mL of fresh medium (49.5 mL of medium  
125 JM plus 0.5 mL of 1.35 M ammonium chloride stock). Control cultures without any added  
126 carbon source were also prepared. To rule out the effect of O<sub>2</sub> tension in methanotrophic growth,  
127 various concentrations of O<sub>2</sub> (1, 5, 10, and 25% O<sub>2</sub> in the headspace) were tested. OD<sub>600</sub> values  
128 were measured for 10 days.

129 **Analytical methods.** To analyze concentrations of methane, ethane, and oxygen, 0.5 mL of gas  
130 phase from each enrichment culture was injected onto GOW-MAC gas chromatograph with an  
131 Altech CTR 1 column and a thermal conductivity detector. The following method parameters  
132 were used: injector, 120 °C; column, 60 °C; detector, 120 °C; and current, 150 mV. Peak areas of  
133 methane, ethane, and oxygen were compared to standards and quantified using the software  
134 ChromPerfect (Justice Laboratory Software, Denville, NJ, USA).

135 Products of ethane oxidation (alcohols and aldehydes) were analyzed using a GC (Agilent 6890N;  
136 Agilent Technologies, Palo Alto, CA, USA) equipped with an HP-INNOWax column (Agilent  
137 Technologies, Palo Alto, CA, USA) and a flame ionization detector.

138 To analyze total suspended solids (TSS), 0.5–5.0 mL of cell suspension was filtered through pre-  
139 washed, dried, and pre-weighted 0.2 µm membrane filters (Pall, Port Washington, NY, USA).  
140 The filtered cells and membrane filters were dried at 105 °C for 24 h, then weighed on an AD-6  
141 autobalance (PerkinElmer, Norwalk, CT, USA).

142 **PHA weight percentages.** To determine PHA weight percent, between 5 and 10 mg of freeze-  
143 dried biomass were weighed then transferred to 12 mL glass vials. Each vial was amended with 2  
144 mL of methanol containing sulfuric acid (3%, vol/vol) and benzoic acid (0.25 mg/mL methanol),

145 supplemented with 2 mL of chloroform, and sealed with a Teflon-lined plastic cap. All vials  
146 were shaken then heated at 95–100 °C for 3.5 h. After cooling to room temperature, 1 mL of  
147 deionized water was added to create an aqueous phase separated from the chloroform organic  
148 phase. The reaction cocktail was mixed on a vortex mixer for 30 s then allowed to partition until  
149 phase separation was complete. The organic phase was then sampled by syringe and analyzed  
150 using a GC (Agilent 6890N; Agilent Technologies, Palo Alto, CA, USA) equipped with an HP-5  
151 column (containing (5% phenyl)-methylpolysiloxane; Agilent Technologies, Palo Alto, CA,  
152 USA) and a flame ionization detector. DL-3-Hydroxybutyric acid sodium salt (Sigma–Aldrich,  
153 St. Louis, MO, USA) and PHBV with 3HV fractions of 5 mol%, 8 mol%, and 12 mol% (Sigma-  
154 Aldrich, St Louis, MO, USA) was used to prepare external calibration curves. The PHA content  
155 (wt%,  $w_{\text{PHA}}/w_{\text{CDW}}$ ) of the samples was calculated by normalizing to initial dry mass.

156 **PHA purification.** PHA was quantified using the gas chromatography protocol of Braunegg et  
157 al. (20). PHA granules were extracted from the cells by suspending 500 mg of freeze-dried cell  
158 material in 50 mL Milli-Q water, adding 400 mg of sodium dodecyl sulfate (>99.0% purity;  
159 Sigma–Aldrich, St. Louis, MO, USA) and 360 mg of EDTA, followed by heating to 60 °C for 60  
160 min to induce cell lysis. The solution was centrifuged ( $3000 \times g$ ) for 15 min, and the pellet  
161 washed three times with deionized water. To purify the PHA, pellets were washed with a 50 mL  
162 sodium hypochlorite (bleach) solution (Clorox 6.15%), incubated at 30 °C with continuous  
163 stirring for 60 min, then centrifuged ( $3000 \times g$ ) for 15 min. Sample pellets were washed and re-  
164 centrifuged three times with deionized water.

165 **Molecular weight analysis.** Molecular weights of PHAs were evaluated using gel permeation  
166 chromatography (GPC). Sample pellets dissolved in chloroform at a concentration of 5 mg/mL



167 for 90 min at 60 °C were filtered through a 0.2 µm PTFE filter, then analyzed with a Shimadzu  
168 UFLC system (Shimadzu Scientific Instruments, Columbia, MD, USA) equipped with a  
169 Shimadzu RID-10A refraction index detector. The GPC was equipped with a Jordi Gel DVB  
170 guard column (500 Å, Jordi Labs, Mansfield, MA, USA) and Jordi Gel DVB analytical columns  
171 (105 Å, Jordi Labs, Mansfield, MA, USA). The temperature of the columns was maintained at  
172 40 °C, and the flow rate of the mobile phase (chloroform) was 1 mL min<sup>-1</sup>. Molecular weights  
173 were calibrated with polystyrene standards from Varian (Calibration Kit S-M2-10, Agilent  
174 Technologies, Palo Alto, CA, USA).

175 **Nuclear magnetic resonance (NMR).** NMR spectroscopy was used to detect the abundance of  
176 <sup>13</sup>C in P3HB samples made from bacteria fed either naturally-abundant (99% <sup>12</sup>C, 1% <sup>13</sup>C )  
177 (control sample) or isotopically-labeled (99% <sup>13</sup>C, 1% <sup>12</sup>C) ethane. A stock solution of internal  
178 standard was made by dissolving 1.0 mg hexamethyldisiloxane (HMDSO) in 1.44 mL CDCl<sub>3</sub>.  
179 For both samples, 0.5 mL of this internal standard stock solution (2.130 x 10<sup>-3</sup> mmol) was  
180 combined with approximately 1 mg of P3HB (an accurate amount of P3HB in the sample was  
181 determined by <sup>1</sup>H-NMR: *vide infra*). <sup>1</sup>H-NMR spectroscopy (500 MHz, 32 scans, delay time (d1)  
182 = 20 s) was firstly used to calculate an accurate amount of dissolved P3HB in the samples by  
183 comparing peak integrations of the CH<sub>3</sub> protons from HMDSO and CH<sub>3</sub> protons from P3HB.  
184 <sup>13</sup>C-NMR spectroscopy (125 MHz, 2044 scans (for P3HB from naturally abundant ethane) and  
185 2392 scans (for P3HB from [<sup>13</sup>C<sub>2</sub>]-ethane), delay time (d1) = 16 s, room temperature, 90° pulse)  
186 was then performed on the two samples. In both samples, a comparison of the peak integrations  
187 of the CH<sub>3</sub> carbons from HMDSO and CH<sub>3</sub> carbon from P3HB was used to determine whether  
188 the carbon was present in a natural abundance or in greater than natural abundance (which would  
189 indicate incorporation of <sup>13</sup>C-carbons from the [<sup>13</sup>C<sub>2</sub>]-ethane).

190 **RESULTS**

191 **Culture purity check and tests of growth with ethane.** Culture purity checks gave no  
192 indication of culture contamination by heterotrophic bacteria (21, 22). All cloned 16S rRNA  
193 gene fragments matched reference sequences for *M. parvus* OBBP. This strain was tested for  
194 growth on ethane. No growth was detected on ethane over a range of headspace O<sub>2</sub> levels (1, 5,  
195 10, and 25%), confirming obligate methanotrophy.

196 **P3HB production using ethane.** Table 1 summarizes P3HB production results for *M. parvus*  
197 OBBP when methane or ethane was added as a carbon source during a nitrogen-limited,  
198 unbalanced growth phase. In either case, P3HB was the final product. When methane was added,  
199 the wt% P3HB was  $48 \pm 5$  wt%, and the TSS was  $1820 \pm 200$  mg/L. When ethane was added,  
200 the wt% P3HB decreased to  $35 \pm 4$  wt%, and the TSS decreased to  $1440 \pm 160$  mg/L.

201 Patterns of gas consumption and generation were evaluated for the serum bottle cultures fed  
202 methane (Figure 1a) or ethane (Figure 1b) on a nitrogen-limited, unbalanced growth phase. The  
203 errors bars represent standard deviations for triplicate batch cultures.

204 When fed methane, almost all methane and oxygen were consumed within the first 9 h. The final  
205 concentration of CO<sub>2</sub> was  $587 \pm 90$  mg CO<sub>2</sub>/L. The maximum specific rate of methane utilization  
206 ( $\hat{q}_{\text{CH}_4}$ ) was  $0.058 \pm 0.009$  g CH<sub>4</sub> g TSS<sup>-1</sup> h<sup>-1</sup>. The maximum specific rate of oxygen utilization  
207 ( $\hat{q}_{\text{O}_2}$ ) was  $0.164 \pm 0.021$  g O<sub>2</sub> g TSS<sup>-1</sup> h<sup>-1</sup>. The maximum specific rate of CO<sub>2</sub> production ( $\hat{q}_{\text{CO}_2}$ )  
208 was  $0.038 \pm 0.007$  g CO<sub>2</sub> g TSS<sup>-1</sup> h<sup>-1</sup>. No inhibition was observed throughout the 24 h period.

209 When fed ethane, both ethane and oxygen were present throughout the 24 h period. The final  
210 concentration of CO<sub>2</sub> was  $185 \pm 33$  mg CO<sub>2</sub>/L. The maximum specific rate of ethane utilization

211 ( $\hat{q}_{C_2H_6}$ ) was  $0.048 \pm 0.008$  g C<sub>2</sub>H<sub>6</sub> g TSS<sup>-1</sup> h<sup>-1</sup>. The maximum specific rate of oxygen utilization  
212 ( $\hat{q}_{O_2}$ ) was  $0.088 \pm 0.015$  g O<sub>2</sub> g TSS<sup>-1</sup> h<sup>-1</sup>. The maximum specific rate of CO<sub>2</sub> production ( $\hat{q}_{CO_2}$ )  
213 was  $0.010 \pm 0.002$  g CO<sub>2</sub> g TSS<sup>-1</sup> h<sup>-1</sup>. The consumption rate of ethane and oxygen slowed down  
214 after  $t = 6$  h, suggesting the presence of inhibitory substances in the cell cultures.

215 **Isotopic enrichment.** <sup>13</sup>C-NMR spectroscopy was used to detect the abundance of <sup>13</sup>C in P3HB  
216 samples made from bacteria fed either naturally-abundant (99% <sup>12</sup>C, 1% <sup>13</sup>C) (control sample)  
217 or isotopically-labeled (99% <sup>13</sup>C, 1% <sup>12</sup>C) ethane. A HMDSO internal standard was used in both  
218 samples (see full Supplemental Material for full calculation). In the control sample, where the  
219 P3HB was synthesized from bacteria supplied with naturally abundant ethane, the carbon peak  
220 integrals indicated that the <sup>13</sup>C-content in the polymer was approximately 1% (i.e. consistent  
221 with the 1% natural abundance of <sup>13</sup>C) (Figure 2b). In contrast, in the P3HB sample from  
222 bacteria supplied with [<sup>13</sup>C<sub>2</sub>]-ethane, the carbon peak integrals indicated that the <sup>13</sup>C-content in  
223 the polymer was approximately 10% (Figure 3b). This demonstrates unequivocally that the  
224 bacteria uptake <sup>13</sup>C-labeled ethane, and that it is utilized in the synthesis of P3HB.

225 **Molecular weight characterization.** Table 2 illustrates the number average molecular weight  
226 ( $M_n$ ) and molecular weight distributions ( $M_w/M_n$ ) of P3HB produced by *M. parvus* OBBP when  
227 fed methane or ethane. Values for  $M_n$  and  $M_w/M_n$  are not statistically different when fed methane  
228 or ethane (p-value of  $M_n = 0.75$ , p-value of  $M_w/M_n = 0.43$ ).

229 **Oxidation products of ethane.** Cell cultures of *M. parvus* OBBP oxidized ethane gas. Products  
230 from the oxidation of ethane included acetaldehyde and acetate (Table 3). Ethanol was not  
231 detected, suggesting that *M. parvus* OBBP has an efficient alcohol dehydrogenase system.

232 **PHBV production from ethane and valerate.** When ethane was the source of carbon and  
233 energy during the PHA accumulation phase, P3HB was the sole PHA produced; when  
234 supplemented with valerate (10 mM),  $12.9 \pm 2.6\%$  of PHBV was generated ( $25 \pm 0.01\%$  3HV  
235 mole fraction).

## 236 **DISCUSSION**

237 Obligate methanotrophs are restricted to grow on C<sub>1</sub> substrates including methane, methanol, and  
238 in some cases formate, formaldehyde, and methylamines (23). While *M. parvus* OBBP is unable  
239 to grow on ethane under conditions of balanced, nutrient-sufficient growth, this work establishes  
240 that *M. parvus* OBBP is able to take up ethane and oxidized it under nitrogen-limited,  
241 unbalanced growth conditions. Methane monooxygenases (MMOs) are known to be non-specific  
242 (17, 24) and capable of oxidizing aliphatic compounds, aromatic compounds, and alkanes,  
243 including ethane (25–31), and, our data indicate that MMO-generated ethanol degrades rapidly to  
244 acetaldehyde then acetic acid. A fraction of the acetic acid is assimilated into P3HB. This is the  
245 first evidence that pure culture of well-known Type II obligate methanotrophs assimilate ethane  
246 and produce P3HB polymer with high molecular weight comparable to the P3HB polymer made  
247 with methane (Table 2). Incorporation of <sup>13</sup>C-labeled ethane was confirmed using <sup>13</sup>C-NMR.

248 Figure 4 illustrates the proposed pathway for oxidation and assimilation of ethane. All the  
249 presented enzymes in *M. parvus* OBBP have been identified and their primary structures are  
250 deposited in publically available databases.

251 MMO oxidation of ethane to ethanol requires reducing equivalents, which can be obtained from  
252 each subsequent oxidation step. Oxidation of ethane yielded mixtures of intermediates in the

253 medium including acetaldehyde and acetate, but no ethanol (Table 3). The absence of ethanol  
254 and low levels of acetaldehyde suggest that *M. parvus* OBBP possesses a highly efficient  
255 dehydrogenase system.

256 Our data indicate that acetic acid is produced inside intracellularly by oxidation of ethane to  
257 ethanol and the acid generated is secreted into solution. The rates of intracellular oxidation of  
258 ethanol to acetate exceed the rates of acetic acid oxidation and assimilation into P3HB, resulting  
259 in the secretion of acetic acid and its accumulation in the media. Levels of acetate in the media  
260 were much higher rate than those of acetaldehyde (Table 3), in close agreement with that  
261 reported previously (31). This result and our analysis of P3HB production (Table 1) indicate that  
262 *M. parvus* OBBP possesses the enzyme systems needed to funnel acetic acid into the P3HB  
263 biosynthetic pathway, with the balance either excreted or oxidized for energy. In the presence of  
264 ethane, MMO activity decreased over time, perhaps due to dissipation of proton gradient needed  
265 for ATP production as acetic acid accumulated (Figure 1b) (32, 33).

266 In summary, the results from this study establish that pure cultures of obligate methanotrophs  
267 can process the two most dominant gases in natural gas into P3HB and PHBV without methane.  
268 This may be industrially significant given that ethane is typically the second-largest component  
269 of natural gas. Our findings also have implications for the way in which we view the  
270 methanotrophic P3HB biosynthesis. Until now, researchers have largely assumed that obligate  
271 methanotrophs are limited to utilization of C<sub>1</sub> compounds. This work demonstrates that this basic  
272 assumption is incorrect for nutrient-limited, unbalanced growth conditions. Under such  
273 conditions, *M. parvus* OBBP can use at least two gas substrates as well as multi-carbon co-  
274 substrates for production of PHAs. Of course, additional studies are needed to generalize this

275 finding for other Type II methanotrophs. In preliminary tests of *Methylosinus trichosporium*  
276 OB3b, ethane addition did not support P3HB production (data not shown).

## 277 **ACKNOWLEDGEMENTS**

278 This work was supported in part by unrestricted gifts from Chevron and by a Samsung  
279 Scholarship. This work was also supported by the Center for the Utilization of Biological  
280 Engineering in Space (CUBES), a Space Technology Research Institute grant from NASA's  
281 Space Technology Research Grants Program under grant or cooperative agreement award  
282 number NNXNNX17AJ31G S02. We thank the Stanford Nano Shared Facilities for staff  
283 assistance, training, and access to instruments required for this research. JF is grateful to the  
284 Stanford Center for Molecular Analysis and Design (CMAD) for a graduate fellowship.

## 285 **REFERENCES**

- 286 1. Karthikeyan OP, Karthigeyan K, Cirés S, Heimann K. 2014. Review of sustainable  
287 methane mitigation and biopolymer production. *Crit Rev Environ Sci Technol* 45:1579–  
288 1610.
- 289 2. Singh BK, Bardgett RD, Smith P, Reay DS. 2010. Microorganisms and climate change:  
290 terrestrial feedbacks and mitigation options. *Nat Rev Microbiol* 8:779–790.
- 291 3. Myung J, Wang Z, Yuan T, Zhang P, Van Nostrand JD, Zhou J, Criddle CS. 2015.  
292 Production of nitrous oxide from nitrite in stable Type II methanotrophic enrichments.  
293 *Environ Sci Technol* 49:10969–10975.
- 294 4. Fei Q, Guarnieri MT, Tao L, Laurens LML, Dowe N, Pienkos PT. 2014. Bioconversion of  
295 natural gas to liquid fuel: Opportunities and challenges. *Biotechnol Adv* 32:596–614.

- 296 5. Hou C. 1984. Propylene oxide production from propylene by immobilized whole cells of  
297 *Methylosinus* sp. CRL 31 in a gas-solid bioreactor. *Appl Microbiol Biotechnol* 19:1–4.
- 298 6. Yazdian F, Hajizadeh S, Shojaosadati SA, Khalilzadeh R, Jahanshahi M, Nosrati M. 2005.  
299 Production of single cell protein from natural gas: parameter optimization and RNA  
300 evaluation. *Iran J Biotechnol* 3:235–242.
- 301 7. Chiemchaisri W, Wu JS, Visvanathan C. 2001. Methanotrophic production of  
302 extracellular polysaccharide in landfill cover soils. *Water Sci Technol* 43:151–158.
- 303 8. Müller H, Hellgren LI, Olsen E, Skrede A. 2004. Lipids rich in phosphatidylethanolamine  
304 from natural gas-utilizing bacteria reduce plasma cholesterol and classes of phospholipids:  
305 A comparison with soybean oil. *Lipids* 39:833–841.
- 306 9. Wendlandt KD, Jechorek M, Helm J, Stottmeister U. 2001. Producing poly-3-  
307 hydroxybutyrate with a high molecular mass from methane. *J Biotechnol* 86:127–133.
- 308 10. Myung J, Kim M, Pan M, Criddle CS, Tang SKY. 2016. Low energy emulsion-based  
309 fermentation enabling accelerated methane mass transfer and growth of poly(3-  
310 hydroxybutyrate)-accumulating methanotrophs. *Bioresour Technol* 207:302–307.
- 311 11. Flanagan JCAJCA, Myung J, Criddle CSCS, Waymouth RMRM. 2016.  
312 Poly(hydroxyalkanoate)s from waste biomass: A combined chemical–biological approach.  
313 *ChemistrySelect* 1:2327–2331.
- 314 12. Myung J, Flanagan JCA, Waymouth RM, Criddle CS. 2016. Methane or methanol-  
315 oxidation dependent synthesis of poly(3-hydroxybutyrate-co-3-hydroxyvalerate) by  
316 obligate Type II methanotrophs. *Process Biochem* 51:561–567.
- 317 13. Cal AJ, Sikkema WD, Ponce MI, Franqui-Villanueva D, Riiff TJ, Orts WJ, Pieja AJ, Lee  
318 CC. 2016. Methanotrophic production of polyhydroxybutyrate-co-hydroxyvalerate with

- 319 high hydroxyvalerate content. *Int J Biol Macromol* 87:302–307.
- 320 14. Myung J, Galega WM, Van Nostrand JD, Yuan T, Zhou J, Criddle CS. 2015. Long-term  
321 cultivation of a stable *Methylocystis*-dominated methanotrophic enrichment enabling  
322 tailored production of poly(3-hydroxybutyrate-co-3-hydroxyvalerate). *Bioresour Technol*  
323 198:811–818.
- 324 15. Myung J, Flanagan JCA, Waymouth RM, Criddle CS. 2017. Expanding the range of  
325 polyhydroxyalkanoates synthesized by methanotrophic bacteria through the utilization of  
326 omega-hydroxyalkanoate co-substrates. *AMB Express* 7:118.
- 327 16. Mueller JC. 1969. Preferential utilization of the methane component of natural gas by a  
328 mixed culture of bacteria. *Can J Microbiol* 15:1114–1116.
- 329 17. Malashenko Y, Sokolov I, Romanovskaya V. 2000. Role of monooxygenase reaction  
330 during assimilation of non-growth substrates by methanotrophs. *J Mol Catal - B Enzym*  
331 10:305–312.
- 332 18. Whittenbury R, Phillips KC, Wilkinson JF. 1970. Enrichment, isolation and some  
333 properties of methane-utilizing bacteria. *J Gen Microbiol* 61:205–218.
- 334 19. Stackebrandt E, Goodfellow M. 1991. Nucleic acid techniques in bacterial systematics.  
335 Wiley, Chichester; New York.
- 336 20. Braunegg G, Sonnleitner B, Lafferty RM. 1978. Rapid Gas-Chromatographic Method for  
337 Determination of Poly-Beta-Hydroxybutyric Acid in Microbial Biomass. *Eur J Appl*  
338 *Microbiol Biotechnol* 6:29–37.
- 339 21. Dedysh SN, Dunfield PF. 2011. Facultative and obligate methanotrophs: How to identify  
340 and differentiate them. *Methods Enzymol* 495:31–44.
- 341 22. Semrau JD, DiSpirito AA, Vuilleumier S. 2011. Facultative methanotrophy: false leads,



- 342 true results, and suggestions for future research. *FEMS Microbiol Lett* 323:1–12.
- 343 23. Dedysh SN, Knief C, Dunfield PF. 2005. *Methylocella* species are facultatively  
344 methanotrophic. *J Bacteriol* 187:4665–4670.
- 345 24. Hou CT, Patel RN, Laskin AI, Barnabe N. 1980. Microbial oxidation of gaseous  
346 hydrocarbons: Oxidation of lower N-alkenes and N-alkanes by resting cell suspensions of  
347 various methylotrophic bacteria, and the effect of methane metabolites. *FEMS Microbiol*  
348 *Lett* 9:267–270.
- 349 25. Criddle CS. 1993. The kinetics of cometabolism. *Biotechnol Bioeng* 41:1048–1056.
- 350 26. Alvarez-Cohen L, McCarty PL. 1991. Product toxicity and cometabolic competitive  
351 inhibition modeling of chloroform and trichloroethylene transformation by  
352 methanotrophic resting cells. *Appl Environ Microbiol* 57:1031–1037.
- 353 27. Fogel MM, Taddeo AR, Fogel S. 1986. Biodegradation of chlorinated ethenes by a  
354 methane-utilizing mixed culture. *Appl Environ Microbiol* 51:720–724.
- 355 28. Higgins IJ, Best DJ, Hammond RC. 1980. New findings in methane-utilizing bacteria  
356 highlight their importance in the biosphere and their commercial potential. *Nature*  
357 286:561–564.
- 358 29. Oldenhuis R, Vink RLJM, Janssen DB, Witholt B. 1989. Degradation of chlorinated  
359 aliphatic hydrocarbons by *Methylosinus trichosporium* OB3b expressing soluble methane  
360 monooxygenase. *Appl Environ Microbiol* 55:2819–2826.
- 361 30. Patel RN, Hou CT, Laskin AI, Felix A. 1982. Microbial oxidation of hydrocarbons:  
362 Properties of a soluble methane monooxygenase from a facultative methane-utilizing  
363 organism, *Methylobacterium* sp. strain CRL-26. *Appl Environ Microbiol* 44:1130–1137.
- 364 31. Imai T, Takigawa H, Nakagawa S, Shen G-J, Kodama T, Minoda Y. 1986. Microbial

- 365           oxidation of hydrocarbons and related compounds by whole-cell suspensions of the  
366           methane-oxidizing bacterium H-2. *Appl Environ Microbiol* 52:1403–1406.
- 367   32.   Axe DD, Bailey JE. 1995. Transport of lactate and acetate through the energized  
368           cytoplasmic membrane of *Escherichia coli*. *Biotechnol Bioeng* 47:8–19.
- 369   33.   Yoon S, Im J, Bandow N, Dispirito AA, Semrau JD. 2011. Constitutive expression of  
370           pMMO by *Methylocystis* strain SB2 when grown on multi-carbon substrates: Implications  
371           for biodegradation of chlorinated ethenes. *Environ Microbiol Rep* 3:182–188.
- 372
- 373

374 **TABLES**

375 Table 1. Final P3HB wt% and TSS values after a 48 h nitrogen-limited, unbalanced growth  
376 phase when methane or ethane was added as a carbon source.

| Carbon source | P3HB wt% | TSS (mg/L) |
|---------------|----------|------------|
| Methane       | 48 ± 5   | 1820 ± 200 |
| Ethane        | 35 ± 4   | 1440 ± 160 |

377

378

379

380 Table 2. Molecular weights and distributions for extracted P3HB.

| Carbon source | $M_n$                        | $M_w/M_n$       |
|---------------|------------------------------|-----------------|
| Methane       | $1.42 \pm 0.20 \text{ E}+06$ | $1.89 \pm 0.05$ |
| Ethane        | $1.37 \pm 0.15 \text{ E}+06$ | $1.85 \pm 0.06$ |

381

382

383

384 Table 3. Oxidation products of ethane by cell cultures of *M. parvus* OBBP during the first hour  
385 in a nitrogen-limited, unbalanced growth phase

| Products detected | Rate of formation (mg product mg TSS <sup>-1</sup> h <sup>-1</sup> ) |
|-------------------|----------------------------------------------------------------------|
| Ethanol           | ND                                                                   |
| Acetaldehyde      | 0.066 ± 0.011                                                        |
| Acetate           | 0.71 ± 0.13                                                          |

386

387

388

## 389 FIGURES

390 Figure 1. Concentrations of methane (○), ethane (□), oxygen (△), and carbon dioxide (×)  
391 measured during the nitrogen-limited, unbalanced growth phase when (a) methane or (b) ethane  
392 was added as a carbon source. Gases in both the gas phase and the liquid phase were taken  
393 account to compute for the concentrations. The errors bars represent standard deviations for  
394 triplicate enrichment cultures.

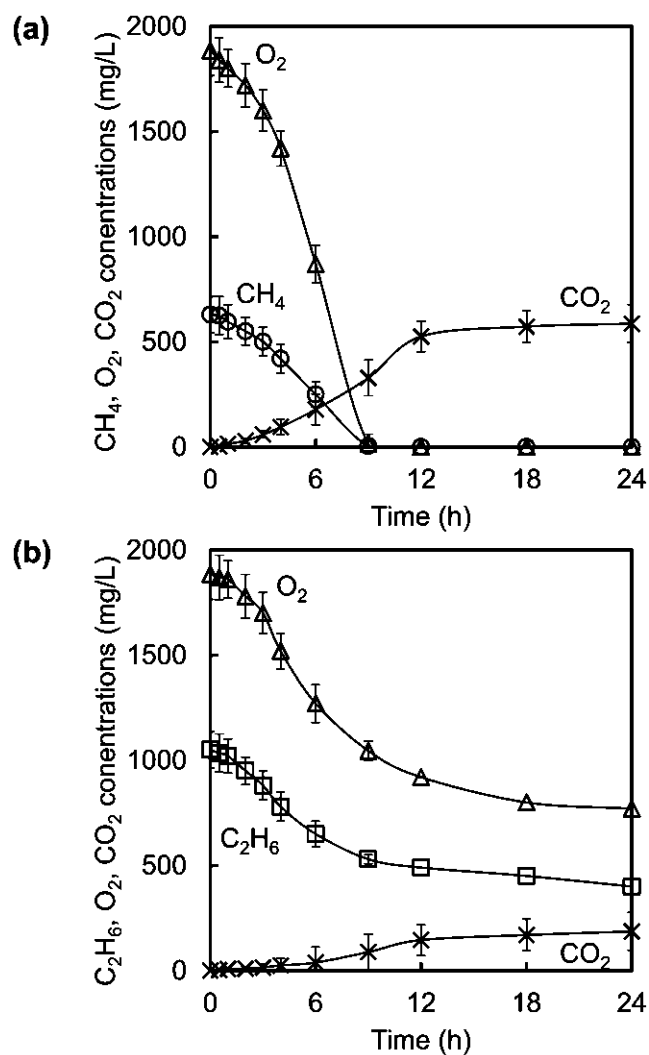

395

396

397 Figure 2. (a)  $^1\text{H}$ - and (b)  $^{13}\text{C}$ -NMR spectra of P3HB polymer produced using naturally abundant  
398 ethane. Numbering of the atoms is illustrated on a chemical structure. Numbers inside the  
399 parentheses are the corresponding peaks' integration numbers.

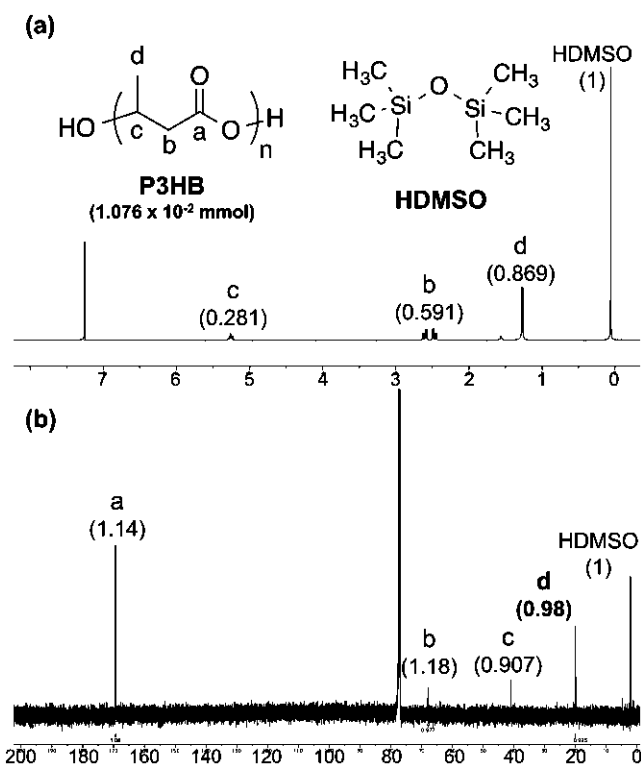

400

401

402

403 Figure 3. (a)  $^1\text{H}$ - and (b)  $^{13}\text{C}$ -NMR spectra of P3HB polymer produced using  $[^{13}\text{C}_2]$ ethane.  
404 Numbering of the atoms is illustrated on a chemical structure. Numbers inside the parentheses  
405 are the corresponding peaks' integration numbers.

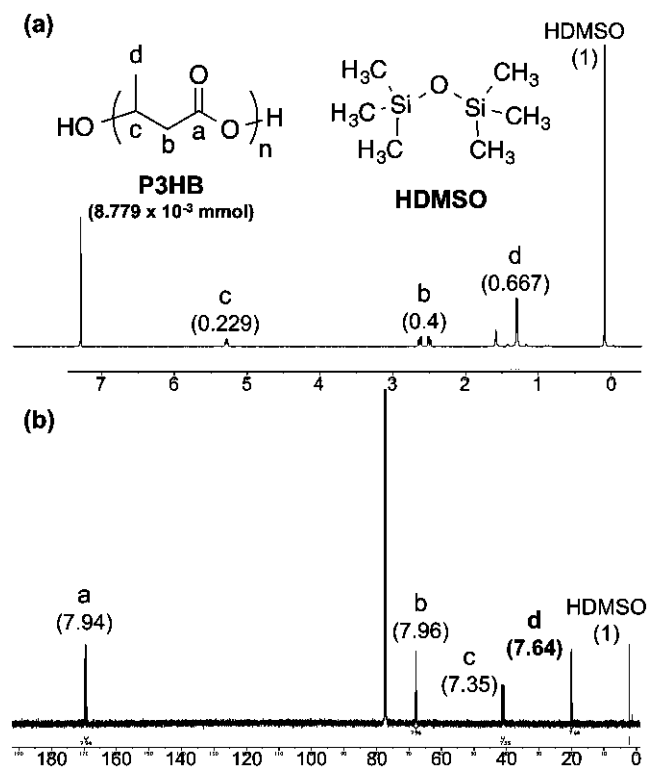

406

407

408



409 Figure 4. Pathway for assimilation of ethane by *M. parvus* OBBP.

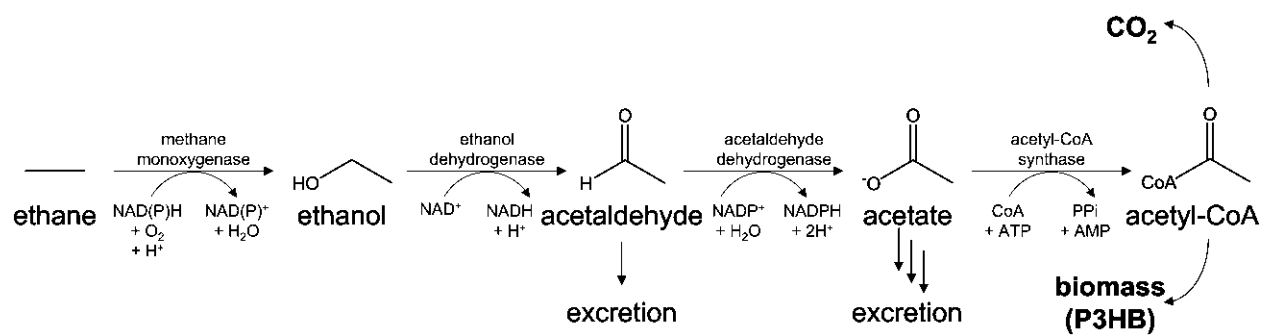

410

411
